# Supplementary material
Source: PubMed Central journal article supplement (PMC2662160)
Supplement: M804709200_1.pdf [file M804709200_1.pdf]

Figure S1. Sequence alignment of a hemoglobin alpha subunit. Tyrosine C7 (Tyr 42, human) is highly conserved.

|        |                                                                |                                                 |                          |
|--------|----------------------------------------------------------------|-------------------------------------------------|--------------------------|
| P69905 | MVLSPADKTNVKAAWGKVGAGHAGEYGAELERMFLSFPTTKTYFPHF-DLSHGSAQVKGH   | 59                                              |                          |
| P69907 | MVLSPADKTNVKAAWGKVGAGHAGEYGAELERMFLSFPTTKTYFPHF-DLSHGSAQVKGH   | 59                                              |                          |
| P01958 | MVLSAADKTNVKAAWSKVGGHAGEYGAELERMFLGFPTTKTYFPHF-DLSHGSAQVKAH    | 59                                              |                          |
| P01965 | -VLSAADKANVKAAWGKVGQAGAHGAEALERMFLGFPTTKTYFPHF-NLSHGSDQVKAH    | 58                                              |                          |
| P01966 | MVLSAADKGNVKAAWGKVGGHAAEYGAELERMFLSFPTTKTYFPHF-DLSHGSAQVKGH    | 59                                              |                          |
| P01945 | -VLSAKDKTNI SEAWGKIGGHAGEYGAELERMFLVYPTTKTYFPHF-DVSHGSAQVKGH   | 58                                              |                          |
| P01994 | MVLSAADKNNVKGIFTKIAGHAEYGAETLERMFTTYPPTTKTYFPHF-DLSHGSAQIKGH   | 59                                              |                          |
| P83135 | MVLTAGDKANVKTVWSKVGSHLEEYGSSETLERLFIYVPTTKTYFPHF-DLHHDASAQVRAH | 59                                              |                          |
| P01999 | MVLSMEDKSNVKAIWGKASGHLEEYGAELERMFCAYPQTKTYFPHF-DMSHNSAQIRAH    | 59                                              |                          |
| P02018 | -SLSDKDAVVKALWAKIGSRADEIGAEALGRMLTVYPQTKTYFSHWSDLSPGSGPVKKH    | 59                                              |                          |
| Q1AGS9 | MSLSAKDKATVKDFFGKMSTRSDDIGAEALSRLVAVYPQTKSYFAHWKSASPGSAPVRKH   | 60                                              |                          |
| P14522 | -VLSAADKTNVKSASFSGIGQADEYGAETLERMFATYPQTKTYFPHF-DLGKGSQVKAH    | 58                                              |                          |
| P07408 | -VLSAADKTAIKHLTGSLRNTAEAWGAESLARMFATTPSTKTYFSKFTDFSSANGKRKVAH  | 59                                              |                          |
|        | *: ** :. . . *:* * : * ** * : : . . . : *                      |                                                 |                          |
| P69905 | GKKVADALTNVAHVDDMPNALSALSDDLHAHKLRVDPVNFKLLSHCLLVTLAAHLPAEFT   | 119                                             |                          |
| P69907 | GKKVADALTNVAHVDDMPNALSALSDDLHAHKLRVDPVNFKLLSHCLLVTLAAHLPAEFT   | 119                                             |                          |
| P01958 | GKKVGDALTLAVGHLLDDLPGALSANLSDLHAHKLRVDPVNFKLLSHCLLVTLAVHLPNDF  | 119                                             |                          |
| P01965 | GQKVADALTKAVGHLLDDLPGALSANLSDLHAHKLRVDPVNFKLLSHCLLVTLAAHHPDDFN | 118                                             |                          |
| P01966 | GAKVAAALTKAVEHLDDLPGALSELSDLHAHKLRVDPVNFKLLSHLLVTLASHLPDFT     | 119                                             |                          |
| P01945 | GKKVADALTNVGHLLDDLPGALSALSDDLHAHKLRVDPVNFKLLSHCLLVTLANHHPADF   | 118                                             |                          |
| P01994 | GKKVVAALIEAANHIDDIAGTSLKLSDDLHAHKLRVDPVNFKLLGQCFLVVAIHHPAALT   | 119                                             |                          |
| P83135 | GRKVLASLGEAVNHIDDI PGALSLSLHAQTLRVDVNFKLLNLCFVVVVGRHHPITILT    | 119                                             |                          |
| P01999 | GKKVFSALHEAVNHIDDLPGALCRSELHAHSLRVDVNFKFLAHCVLVVFVFAIHHPALS    | 119                                             |                          |
| P02018 | GKTIMGAVGDAVSKIDDLVGLSALSSELHAFKLRIDPANFKILAHNVI VVIGMLFPGDFT  | 119                                             |                          |
| Q1AGS9 | GITIMGGVYDAVGKIDDLKAGLLSLSSELHAFMLRVDVNFKLLAHCMLVCMVMVFPEEFT   | 120                                             |                          |
| P14522 | GKKVAAALVEAANA VDDIAGALSLSLHAQTLRVDVNFKLLGQCFLVTVATHNPSLLT     | 118                                             |                          |
| P07408 | GGKVLNAVADATDHLDNVAGHLDP LAVLHGTTLCVDPHNFP LLTQCILVTLAAHL-TELK | 118                                             |                          |
|        | * . : . : * . : : * * : * . * : * * * : * . : . . : .          |                                                 |                          |
| P69905 | PAVHASLDKFLASVSTVLTISKYR                                       | 142                                             |                          |
| P69907 | PAVHASLDKFLASVSTVLTISKYR                                       | 142                                             |                          |
| P01958 | PAVHASLDKFLSSVSTVLTISKYR                                       | 142                                             |                          |
| P01965 | PSVHASLDKFLANVSTVLTISKYR                                       | 141                                             |                          |
| P01966 | PAVHASLDKFLANVSTVLTISKYR                                       | 142                                             |                          |
| P01945 | PAVHASLDKFFASVSTVLTISKYR                                       | 141                                             |                          |
| P01994 | PEVHASLDKFLCAVGTVLTAKYR                                        | 142                                             |                          |
| P83135 | PEVHVS LDKFLSAVATALTSKYR                                       | 142                                             |                          |
| P01999 | PEIHASLDKFLCAVSAVLTISKYR                                       | 142                                             |                          |
| P02018 | PEVHMSVDKFFQNLALALSEKYR                                        | 142                                             |                          |
| Q1AGS9 | PQVHVAVDKFLAQLALALCEKYR                                        | 143                                             |                          |
| P14522 | PEVHASLDKFLCAVGTVLTAKYR                                        | 141                                             |                          |
| P07408 | PETHCALDKFLCEVATALGSHYR                                        | 141                                             |                          |
|        | * * : : * * : . . * : * *                                      |                                                 |                          |
| P69905 | HBA_HUMAN                                                      | Homo sapiens (Human)                            | Hemoglobin alpha chain   |
| P69907 | HBA_PANTR                                                      | Pan troglodytes (Chimpanzee)                    | Hemoglobin alpha chain   |
| P01958 | HBA_HORSE                                                      | Equus caballus (Horse)                          | Hemoglobin alpha chain   |
| P01965 | HBA_PIG                                                        | Sus scrofa (Pig)                                | Hemoglobin alpha chain   |
| P01966 | HBA_BOVIN                                                      | Bos taurus (Bovine)                             | Hemoglobin alpha chain   |
| P01945 | HBA_MESAU                                                      | Mesocricetus auratus (Golden hamster)           | Hemoglobin alpha chain   |
| P01994 | HBA_CHICK                                                      | Gallus gallus (Chicken)                         | Hemoglobin alpha-A chain |
| P14522 | HBA_TURME                                                      | Turdus merula (Blackbird)                       | Hemoglobin alpha-A chain |
| P83135 | HBAA_GEONI                                                     | Geochelone nigra (Galapagos giant tortoise)     | Hemoglobin alpha-A chain |
| P01999 | HBA_ALLMI                                                      | Alligator mississippiensis (American alligator) | Hemoglobin alpha chain   |
| P02018 | HBA_CARAU                                                      | Carassius auratus (Goldfish)                    | Hemoglobin alpha chain   |
| Q1AGS9 | HBAI_BORSA                                                     | Boreogadus saida (Polar cod)                    | Hemoglobin alpha-1 chain |
| P07408 | HBA_SQUAC                                                      | Squalus acanthias (Spiny dogfish)               | Hemoglobin alpha chain   |

Figure S2. Sequence alignment of a hemoglobin beta subunit. Phenylalanine C7 (Phe 41, human) is largely conserved throughout mammals and birds, but is a tyrosine in amphibians and fish, whilst split between tyrosine and phenylalanine in reptiles.

```

P68871      MVHLTPEEKSAVTALWGKVNVEVGGGALGRLLVVPWTQRFFESFGDLSTPDAVMGNPK 60
P68873      MVHLTPEEKSAVTALWGKVNVEVGGGALGRLLVVPWTQRFFESFGDLSTPDAVMGNPK 60
P02062      -VQLSGEEKAAVLALWDKVNVEEVGGGALGRLLVVPWTQRFFDSFGDLSPGAVMGNPK 59
P02067      MVHLSAEKEAVALGLWGKVNVEVGGGALGRLLVVPWTQRFFESFGDLSTADAVMGNPK 60
P02070      --MLTAEKAAVTAFWGKVKVDEVGGGALGRLLVVPWTQRFFESFGDLSTADAVMNNPK 58
P02094      MVHLTDAEKALVTGLWGKVNADAVGAEALGRLLVVPWTQRFFEFHFGDLSSASAVMNNPQ 60
P02112      MVHWTAEKQLITGLWGKVNVAECGAEALRLLIVYPWTQRFFASFGNLSSTAILGNPK 60
P14524      -VQWTAEEKQLITGLWGKVNVAECGAEALRLLIVYPWTQRFFASFGNLSSTAVLGNPK 59
P83123      MVHWTPEEKQYITSLWAKVNVEEVGGGALRLLIVYPWTQRFFSFGNLSASAILHNAK 60
P02130      -ASFDAHERKFIIVDLWAKVDVAQCADALSRMLIVYPWKRRYFEHFGKMCNAHDILHNSK 59
P02140      -VEWTDAAERSAIITGLWGKLNPDDELGPQALARCLIVYPWTQRFFATFGNLSSPAAILGNPK 59
Q1AGS7      MVEWTATERTHIEAIWSKIDIDVCGPLALQRCLIVYPWTQRFFGSGFDLSTDAIVGNPK 60
P07409      -VHWTGEEKALVNAVWTKTDHQAVVAKALERLFFVVPWTKTYFVKFNGKPHAS----DST 55
          *  :  :  . * * .      ** * : : * * * : : * *      : .

```

```

P68871      VKAHGKKVLGAFSDGLAHLNLDKGTFAATLSELHCDKLVDPENFRLLGNVLCVLAHHFG 120
P68873      VKAHGKKVLGAFSDGLAHLNLDKGTFAATLSELHCDKLVDPENFRLLGNVLCVLAHHFG 120
P02062      VKAHGKKVLHSPFEGVHLLDNLKGTFAALSELHCDKLVDPENFRLLGNVLCVLAHHFG 119
P02067      VKAHGKKVLQSFSDGLKHLNLDKGTFAALSELHCDKLVDPENFRLLGNVLCVLAHHFG 120
P02070      VKAHGKKVLDSPFNGMKHLLDNLKGTFAALSELHCDKLVDPENFRLLGNVLCVLAHHFG 118
P02094      VKAHGKKVIHSPFADGLKHLNLDKGTFAALSELHCDKLVDPENFRLLGNVLCVLAHHFG 120
P02112      VRAHGKKVLTSPFGDAVKNLNLDKGTFAALSELHCDKLVDPENFRLLGNVLCVLAHHFG 120
P14524      VQAHGKKVLTSPFGDAVKNLNLDKGTFAALSELHCDKLVDPENFRLLGNVLCVLAHHFG 119
P83123      VLAHGKKVLTSPFGDAVKNLNLDKGTFAALSELHCDKLVDPENFRLLGNVLCVLAHHFG 120
P02130      VQEHGKKVLSAFGEAVKHLNLDKGTFAALSELHCDKLVDPENFRLLGNVLCVLAHHFG 119
P02140      VAAHGRTVMGGLERAIKNMDNIKATYAPLSVMHSEKLVDPENFRLLGNVLCVLAHHFG 119
Q1AGS7      VANHGVALTGLRALTALDHMDIKATYATLSVLHSEKLVDPENFRLLGNVLCVLAHHFG 120
P07409      VQTHAGKVVSAITVAYNHIDDKPHFVELSKKHYEELHVDPENFKLLANCLEVELGHALH 115
          *  * .  . :  . :  . : : * . : *  *  *  * : : * * * * * : * * : :

```

```

P68871      KE-FTPPVQAAYQKVVAGVANALAHKYH 147
P68873      KE-FTPPVQAAYQKVVAGVANALAHKYH 147
P02062      KD-FTPPELQASYQKVVAGVANALAHKYH 146
P02067      HD-FNPNVQAAYQKVVAGVANALAHKYH 147
P02070      KE-FTPVLAQDFQKVVAGVANALAHRYH 145
P02094      KD-FTPSAQSAFHKVVAGVANALAHKYH 147
P02112      KD-FTPECQAAYQKLVVVVAHALARKYH 147
P14524      KD-FTPDCQAAYQKLVVVVAHALARKYH 146
P83123      KE-FTPASQAAYTKLVNVAHALALGYH 147
P02130      ED-FSVECHAAAFQKLVVQVAAALAAEYH 146
P02140      PSGFNADVQEAQKFLSVVVSALCRQYH 147
Q1AGS7      PT-LRPEMQAAYQKYLAVVVSALGRQYH 147
P07409      KE-FTPEVQAAYSKFSNVVVDALSKGYH 142
          :  :  :  *  * .  **  **

```

|        |            |                                                 |                         |
|--------|------------|-------------------------------------------------|-------------------------|
| P68871 | HBB_HUMAN  | Homo sapiens (Human)                            | Hemoglobin beta chain   |
| P68873 | HBB_PANTR  | Pan troglodytes (Chimpanzee)                    | Hemoglobin beta chain   |
| P02062 | HBB_HORSE  | Equus caballus (Horse)                          | Hemoglobin beta chain   |
| P02067 | HBB_PIG    | Sus scrofa (Pig)                                | Hemoglobin beta chain   |
| P02070 | HBB_BOVIN  | Bos taurus (Bovine)                             | Hemoglobin beta chain   |
| P02094 | HBB_MESAU  | Mesocricetus auratus (Golden hamster)           | Hemoglobin beta chain   |
| P02112 | HBB_CHICK  | Gallus gallus (Chicken)                         | Hemoglobin beta chain   |
| P14524 | HBB_TURME  | Turdus merula (Blackbird)                       | Hemoglobin beta chain   |
| P83123 | HBB_GEONI  | Geochelone nigra (Galapagos giant tortoise)     | Hemoglobin beta chain   |
| P02130 | HBB_ALLMI  | Alligator mississippiensis (American alligator) | Hemoglobin beta chain   |
| P02140 | HBB_CARAU  | Carassius auratus (Goldfish)                    | Hemoglobin beta chain   |
| Q1AGS7 | HBB1_BORSA | Boreogadus saida (Polar cod)                    | Hemoglobin beta-1 chain |
| P07409 | HBB_SQUAC  | Squalus acanthias (Spiny dogfish)               | Hemoglobin beta chain   |
